# Supplementary material for: OncomiR-196 promotes an invasive phenotype in oral cancer through the NME4-JNK-TIMP1-MMP signaling pathway
Source: PubMed Central journal article supplement (PMC4176851; doi:10.1186/1476-4598-13-218), 2014-09-19

# Supplementary Figure S1

**A**

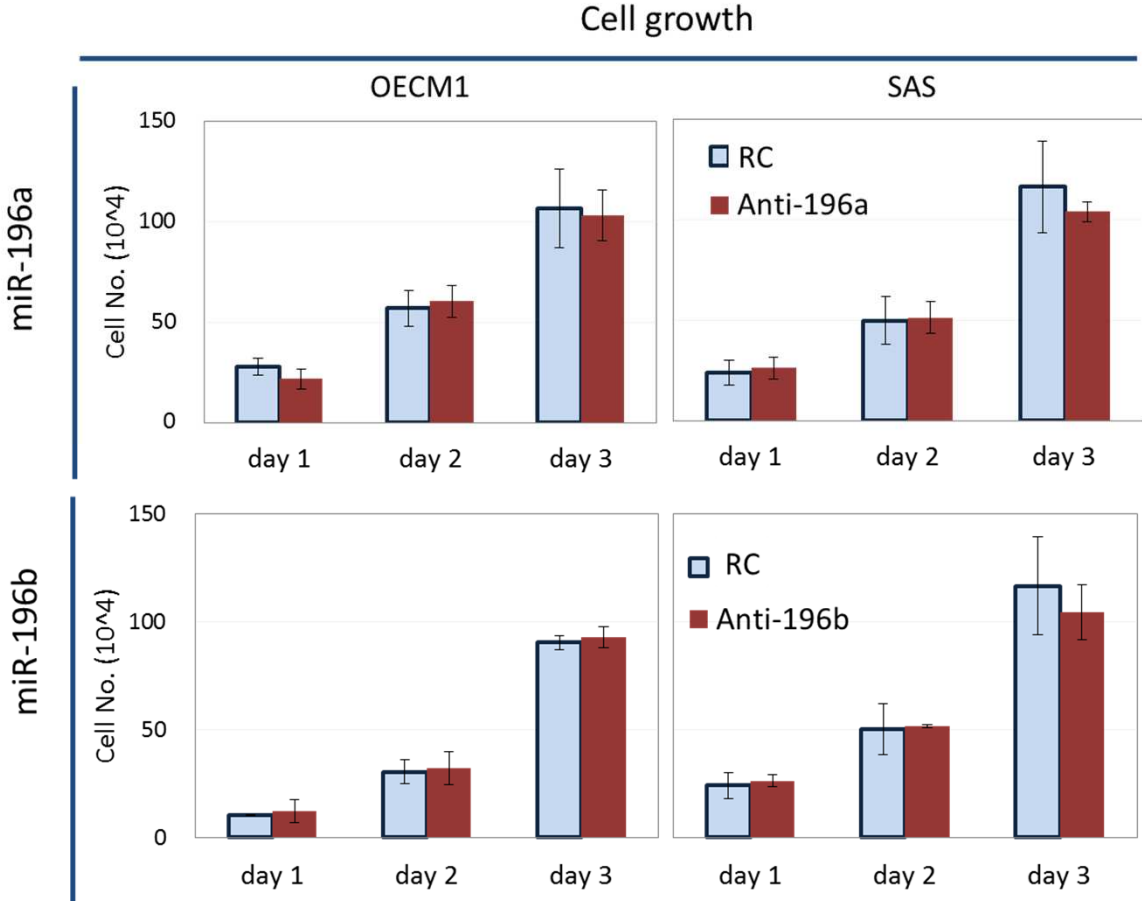

**B**

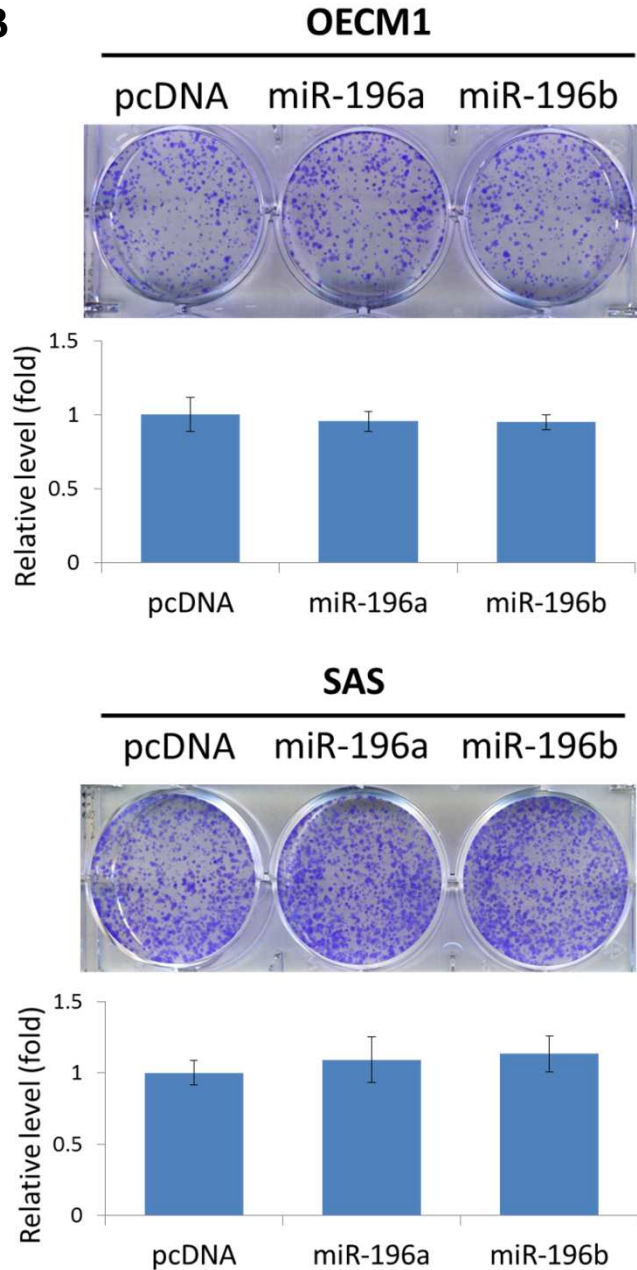

# Supplementary Figure S2

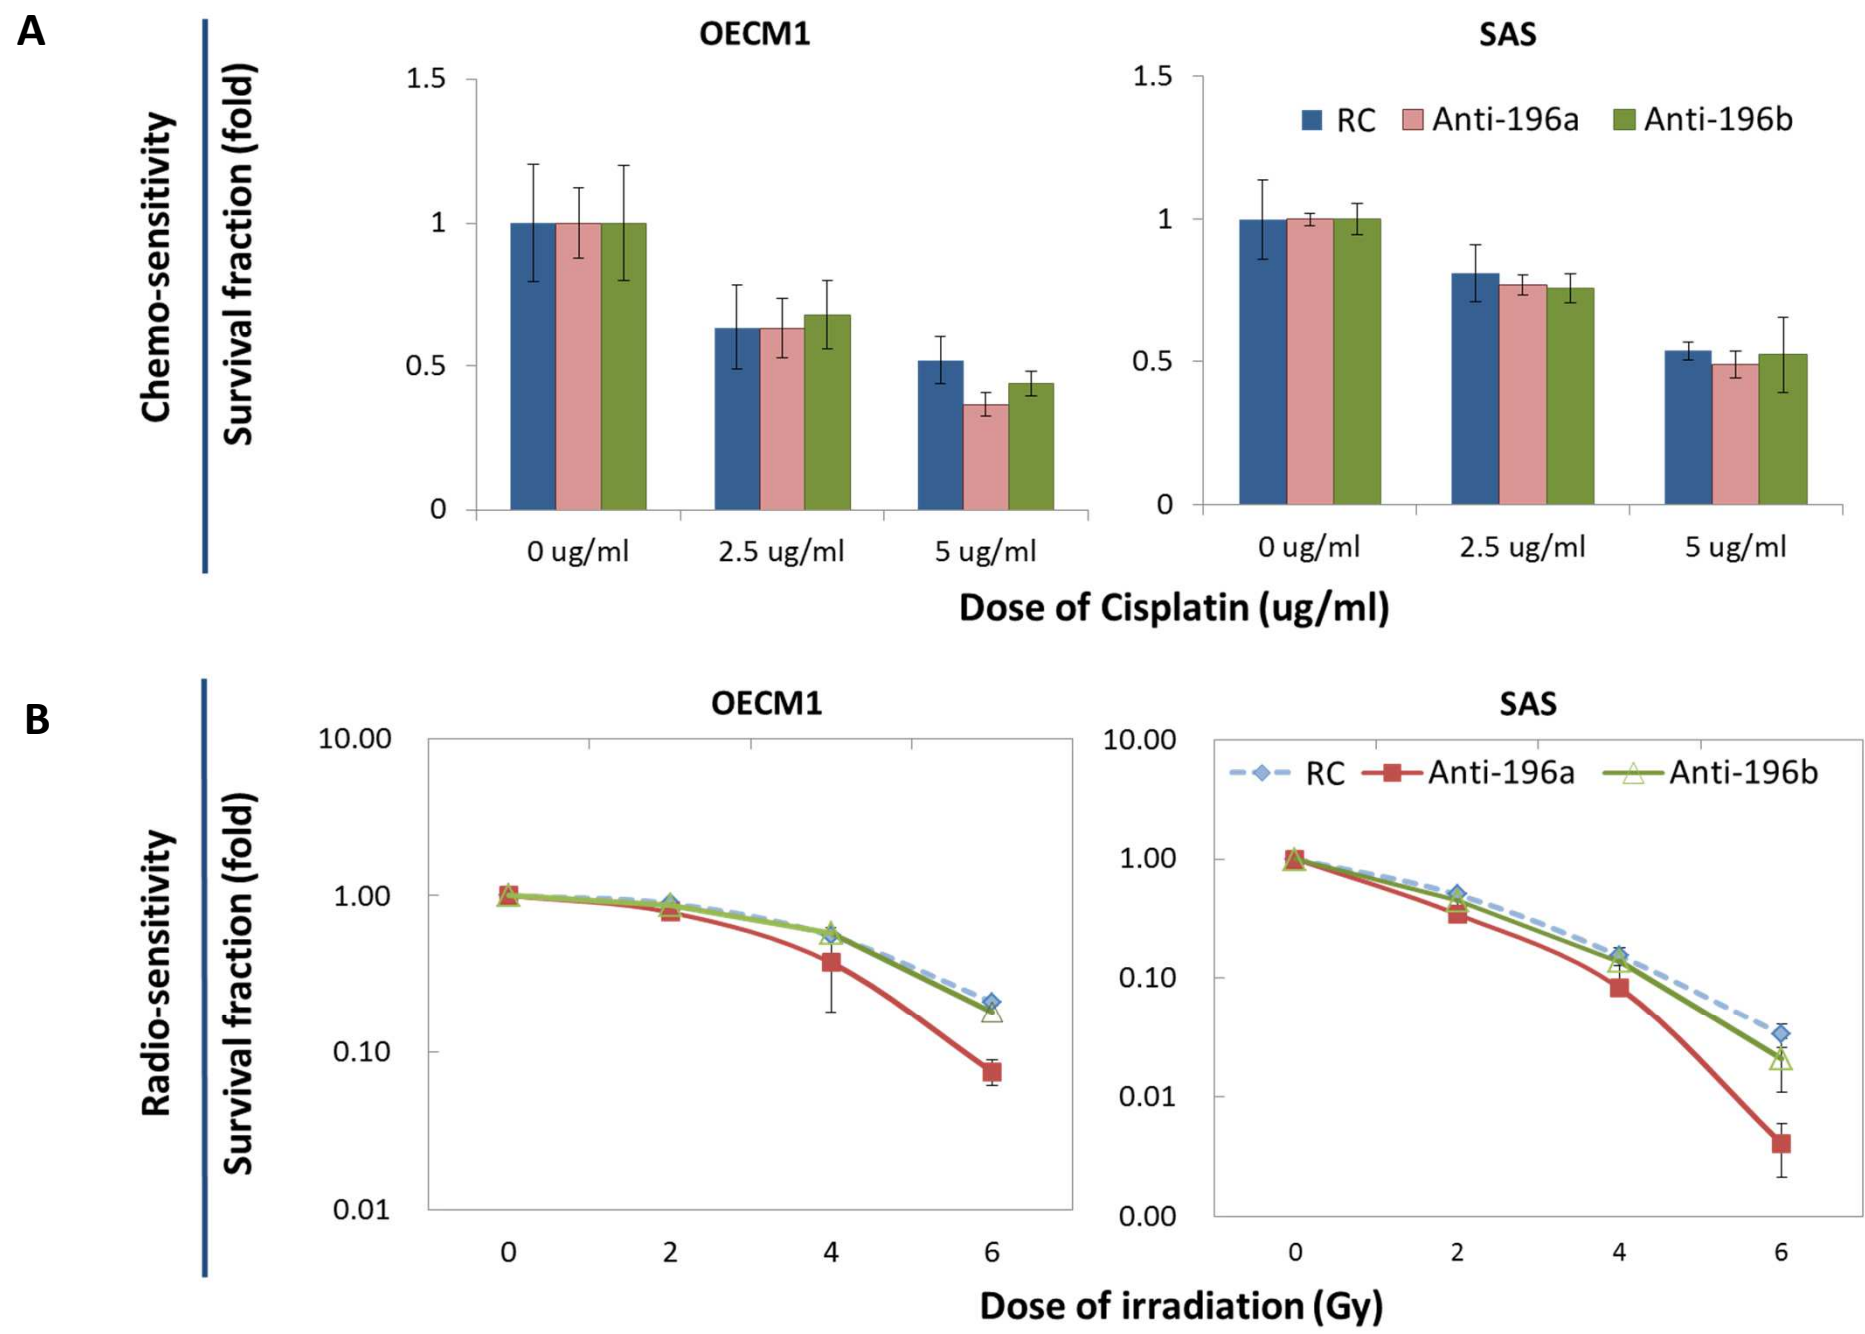

## Supplementary Figure S3

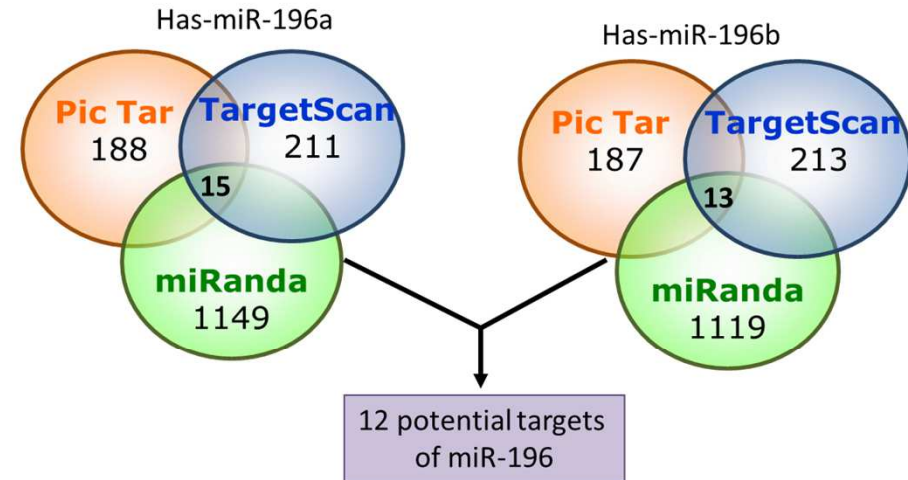

| Target gene | Human RefSeq Id | CHR | Annotation                                                                                            |
|-------------|-----------------|-----|-------------------------------------------------------------------------------------------------------|
| ABCB9       | NM_203445       | 11  | Homo sapiens ATP-binding cassette, sub-family B (MDR/TAP), member 9                                   |
| CDYL        | NM_004824       | X   | Homo sapiens chromodomain protein, Y-like, transcript variant 1                                       |
| COL1A2      | NM_000089       | 2   | Homo sapiens collagen, type I, alpha 2                                                                |
| GATA6       | NM_005257       | 19  | Homo sapiens GATA binding protein 6                                                                   |
| HAND1       | NM_004821       | 19  | Homo sapiens heart and neural crest derivatives expressed 1                                           |
| HOXA5       | NM_019102       | 16  | Homo sapiens homeo box A5                                                                             |
| HOXB6       | NM_156036       | 1   | Homo sapiens homeo box B6                                                                             |
| HOXB7       | NM_004502       | 8   | Homo sapiens homeo box B7                                                                             |
| HOXC8       | NM_022658       | 9   | Homo sapiens homeo box C8                                                                             |
| MGAT4A      | NM_012214       | 12  | Homo sapiens mannosyl (alpha-1,3-)-glycoprotein beta-1,4-N-acetylglucosaminyltransferase, isoenzyme A |
| SMCR8       | NM_144775       | 2   | Homo sapiens Smith-Magenis syndrome chromosome region, candidate 8                                    |
| NME4        | NM_005009       | 8   | Homo sapiens non-metastatic cells 4, protein expressed in                                             |

Supplementary Figure S4

miR-196 down-regulated

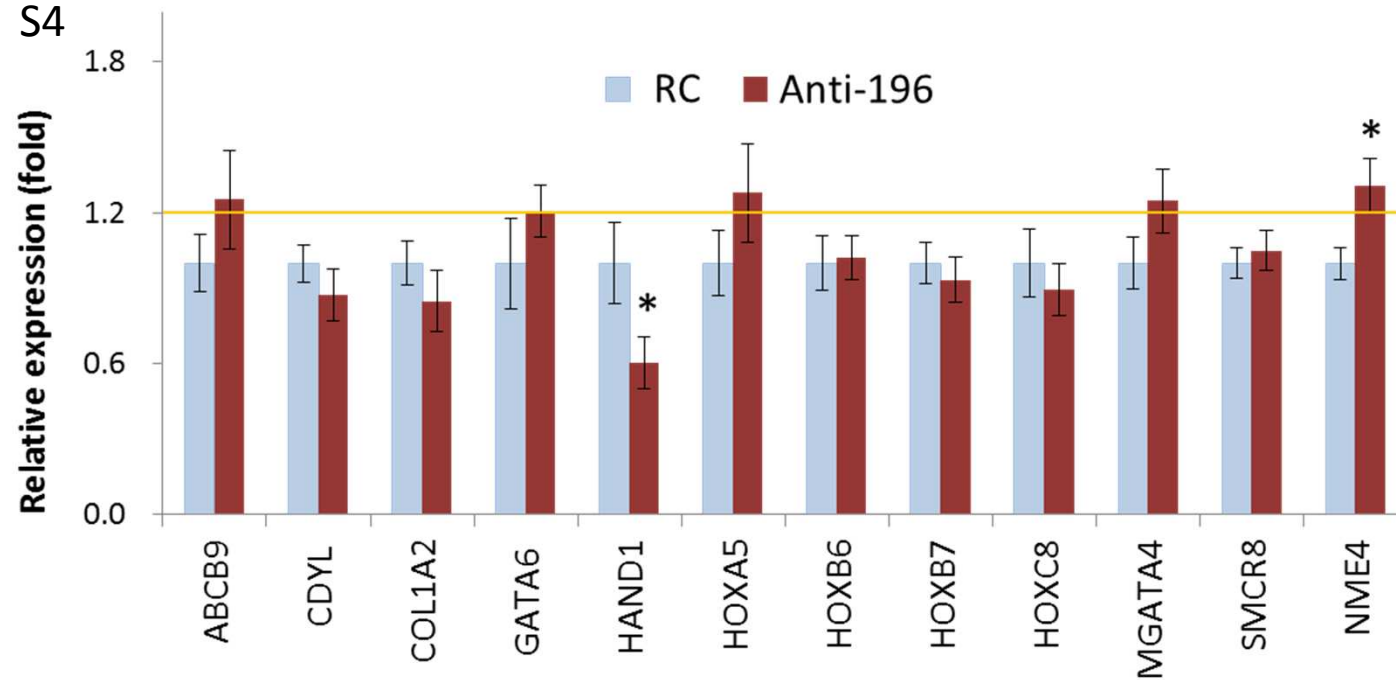

miR-196 up-regulated

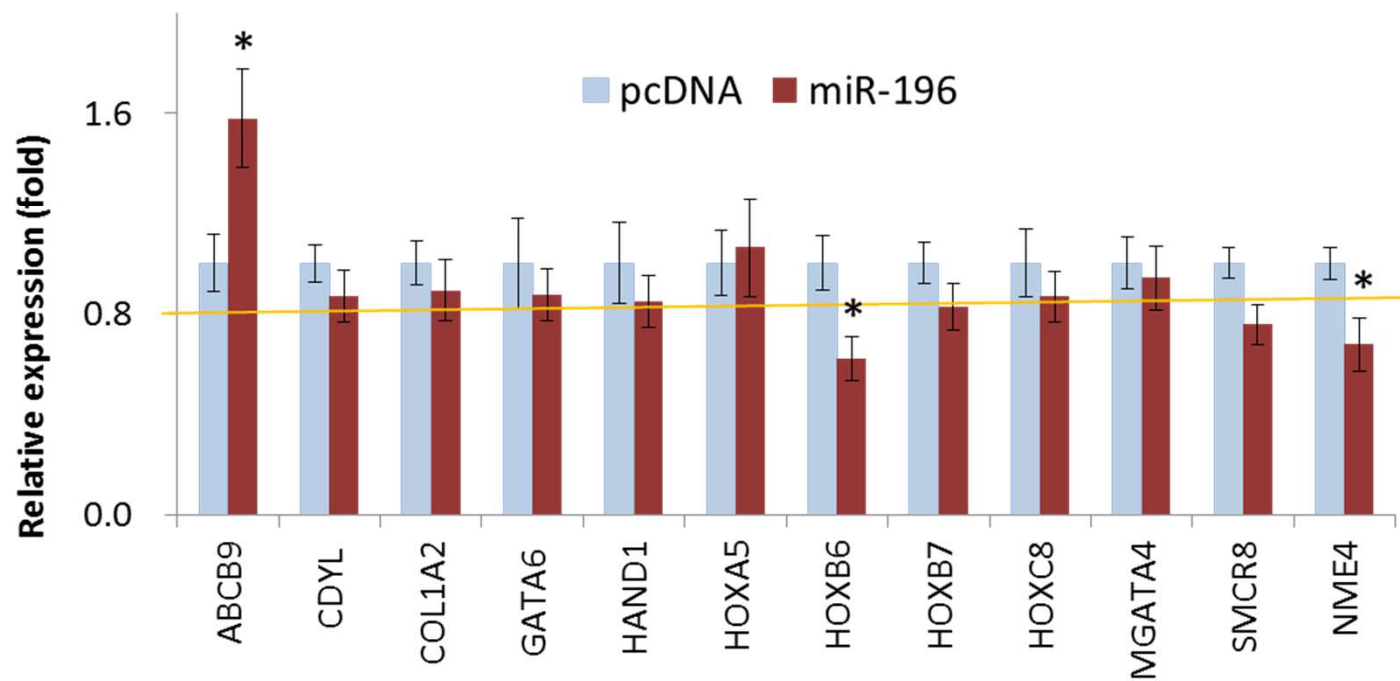

Supplementary Figure S5

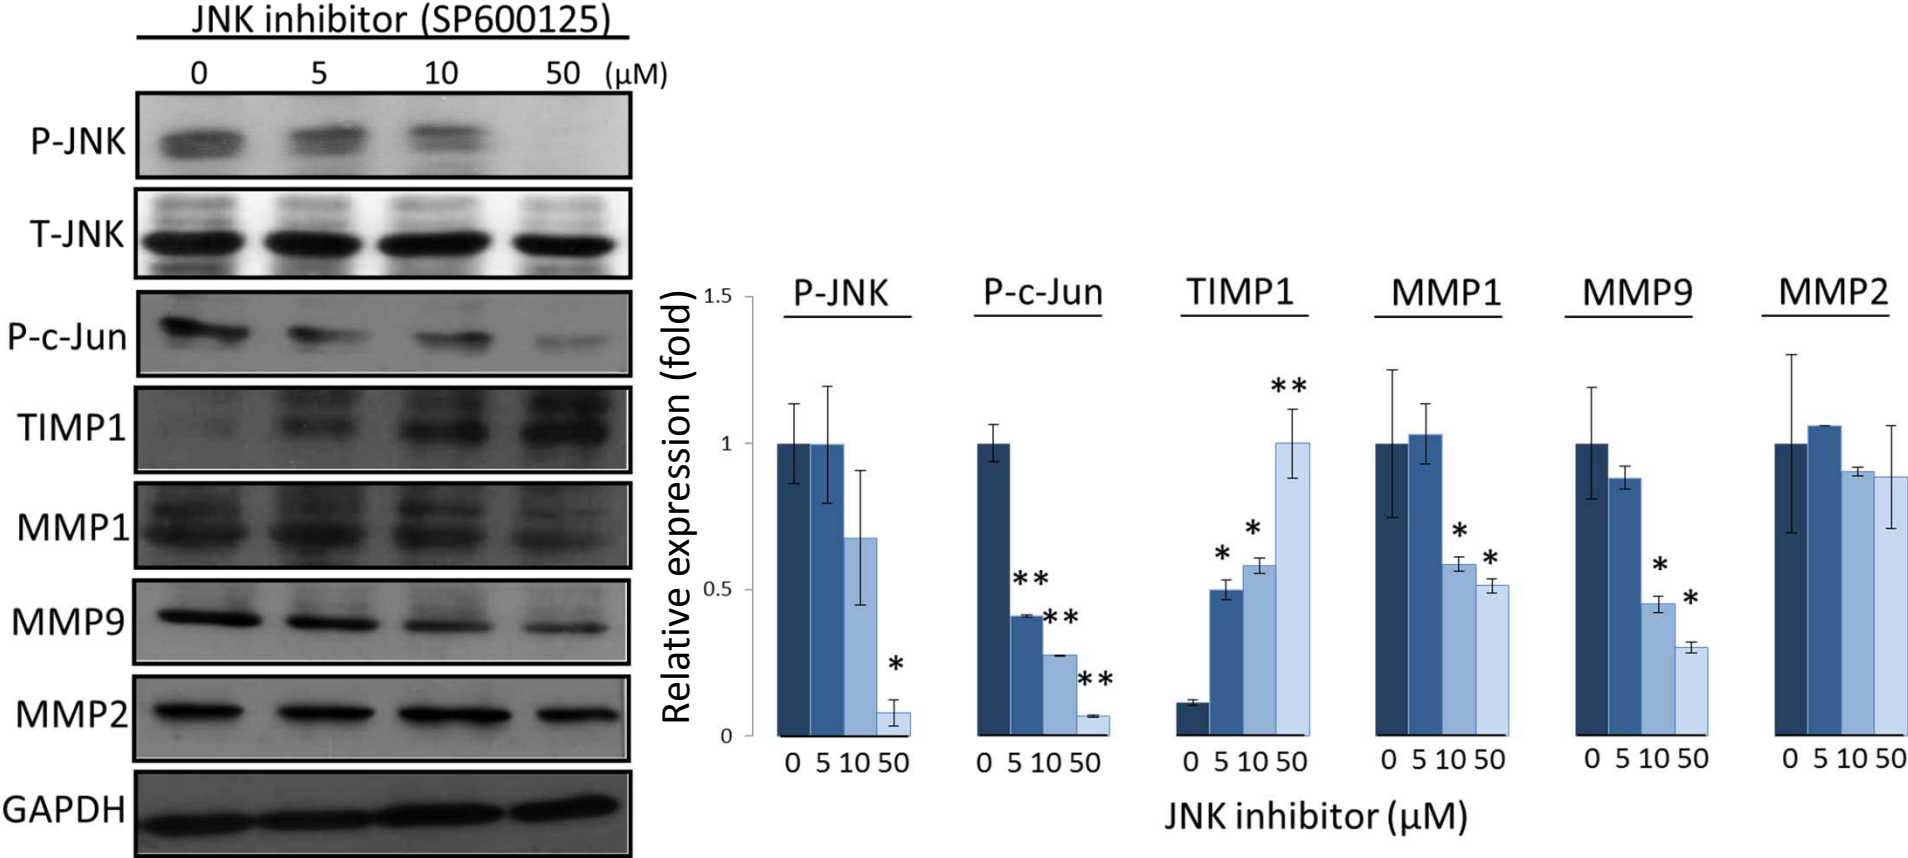

Supplementary Figure S6

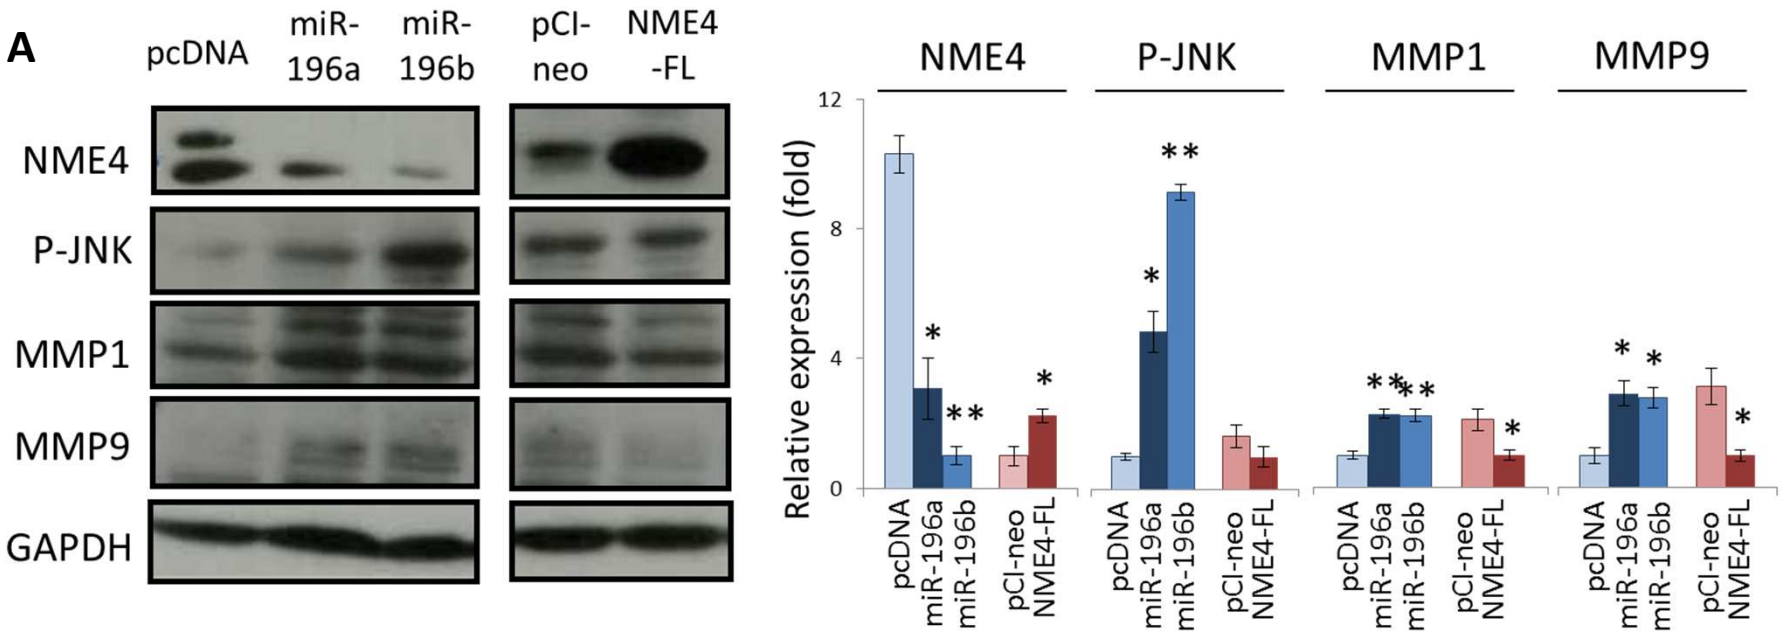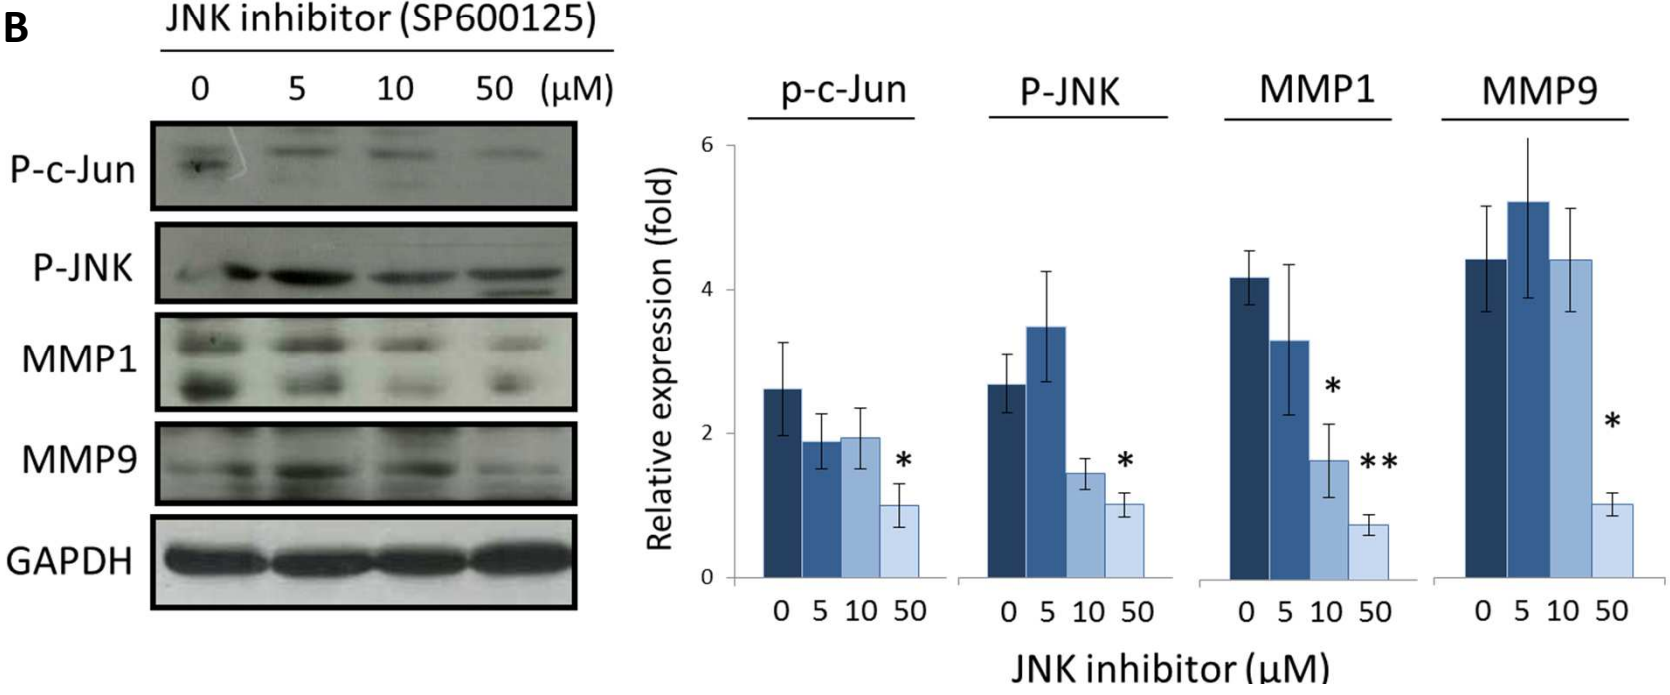

Supplement: 12943_2014_1420_MOESM2_ESM.pdf [file 12943_2014_1420_MOESM2_ESM.pdf]
